# Supplementary material for: Monocytes Acquire the Ability to Prime Tissue-Resident T Cells via IL-10-Mediated TGF-β Release
Source: PubMed Central journal article supplement — Cell Rep. Author manuscript; Available in PMC 2020 Jan 30. (PMC6825402; doi:10.1016/j.celrep.2019.06.087), 2019-07-30
Supplement: NIHMS1054594-supplement-Supplemental_1.pdf [file NIHMS1054594-supplement-Supplemental_1.pdf]

**Cell Reports, Volume 28**

**Supplemental Information**

**Monocytes Acquire the Ability  
to Prime Tissue-Resident T Cells  
via IL-10-Mediated TGF- $\beta$  Release**

**Elizabeth A. Thompson, Patricia A. Darrah, Kathryn E. Foulds, Elena Hoffer, Alayna Caffrey-Carr, Sophie Norenstedt, Leif Perbeck, Robert A. Seder, Ross M. Kedl, and Karin Loré**

Figure S1

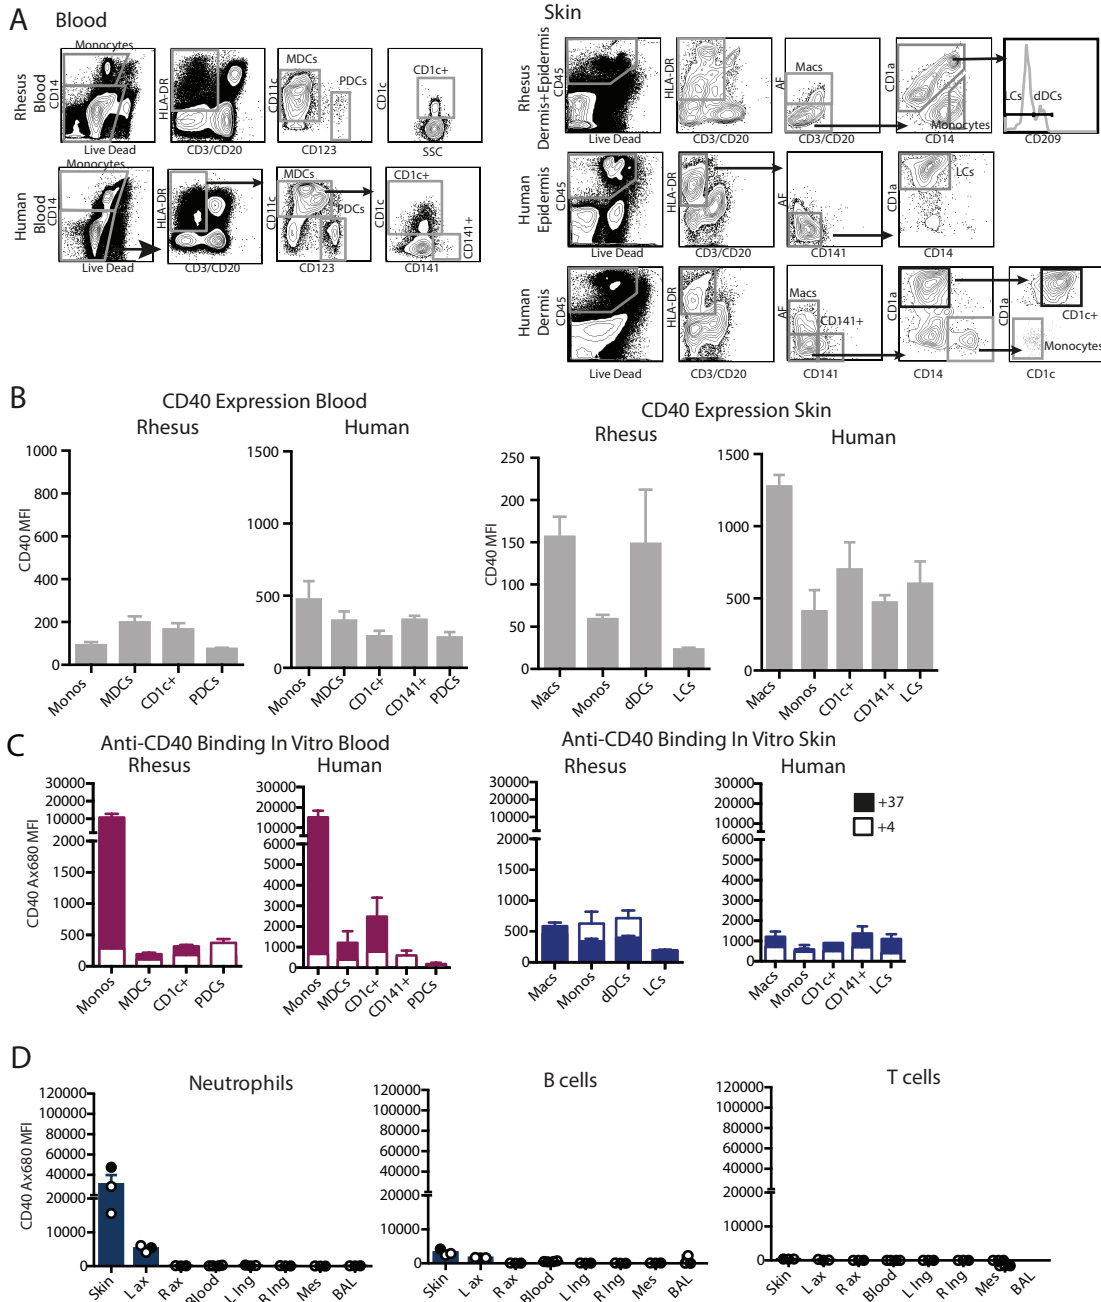

**Supplemental Figure 1: CD40 expression and binding, Related to Figure 1**

(A) Representative gating for rhesus and human APCs in blood and skin used throughout study. (B) Subsets identified above were evaluated for CD40 expression at baseline. (C) APCs were cultured in vitro for 24 hours with 1ug/ml anti-CD40 Alexa-680 at 37C (for Ab binding and internalization) or 4C (for Ab binding only) from human or rhesus blood and skin. (D) In vivo binding of anti-CD40 Alexa-680 following subcutaneous administration to Neutrophils, B cells, and T cells in different tissues. (Mean±SEM)

Figure S2

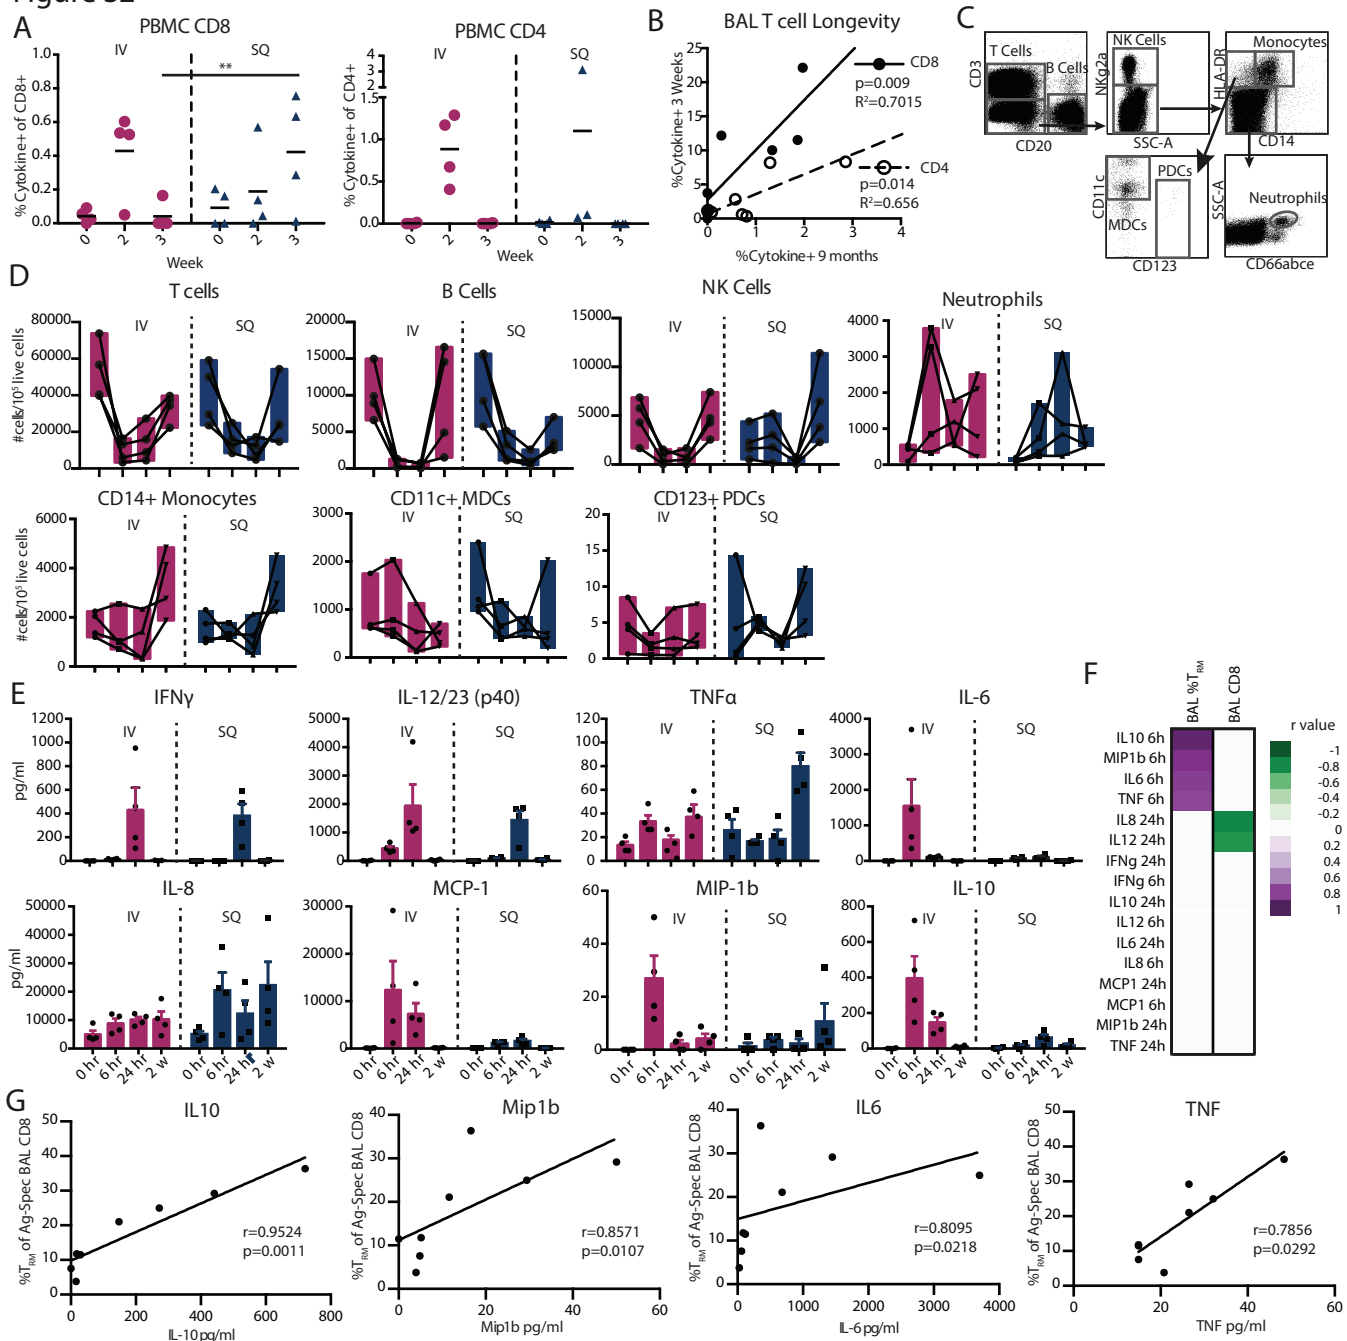

**Supplemental Figure 2: Immunization of rhesus macaques with anti-CD40Ab and Poly IC:LC, Related to Figure 2**

Rhesus macaques were immunized as described in Fig 2. Circulating PBMCs were monitored for antigen-specific T cells (2-3 weeks post immunization) and innate activity (6-24 hours after immunization). (A) Antigen-specific CD8 and CD4 T cell responses in PBMCs. (B) Correlation of antigen-specific CD8 and CD4 T cell responses in the BAL at 3 weeks and 9 months post immunization. (C) Gating scheme for evaluation of innate cell mobilization. (D) Frequencies of cell subsets in the blood following immunization as determined by flow cytometry. (E) Cytokine levels in plasma (pg/ml). (Mean $\pm$ SEM) (F) All cytokines measured together with frequency antigen-specific BAL CD8 T cells and frequency of BAL T<sub>RM</sub> were analyzed using a multivariate non-parametric Spearman's test. Correlations with a non-significant p value (>0.05) had Spearman's coefficient changed to 0. (G) Correlation of frequency of antigen-specific TRM in BAL at 3 weeks (Y-axis) with cytokines showing a significant correlation (X-axis).

Figure S3

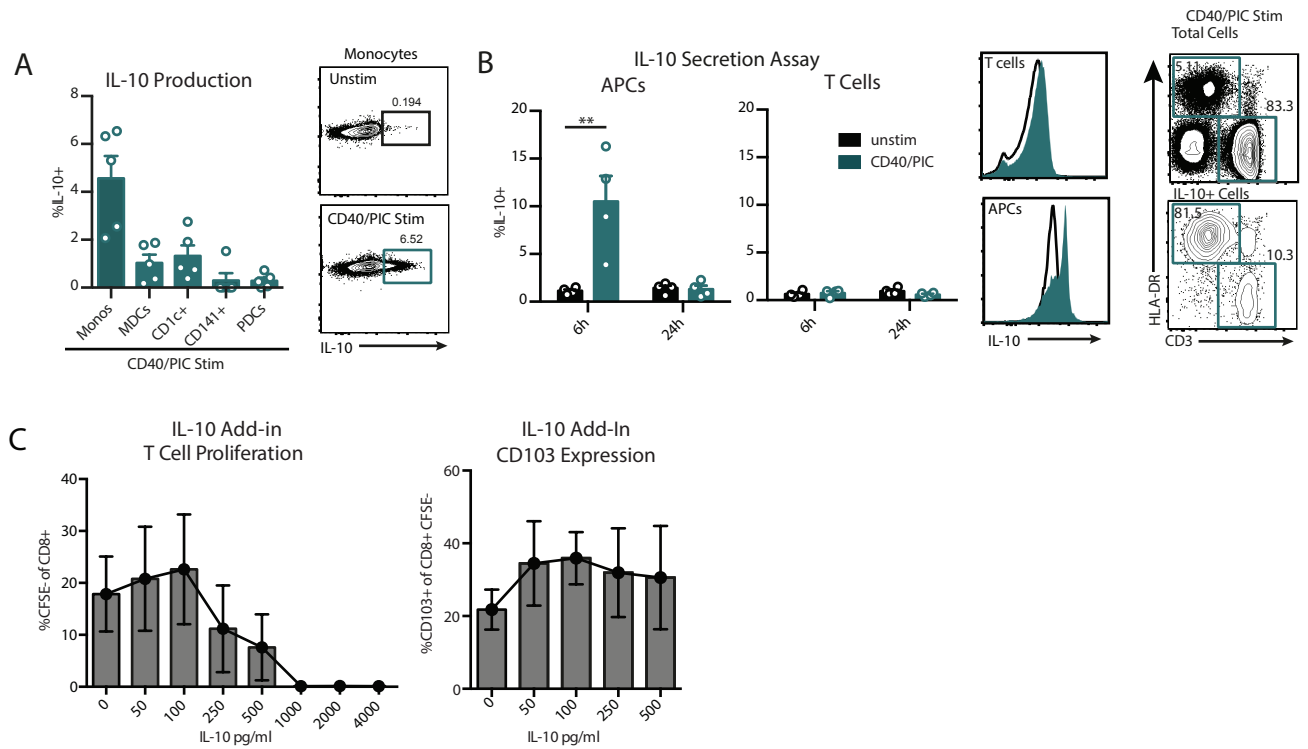

**Supplemental Figure 3: Monocytes are main producer of IL-10, Related to Figure 3**

(A) Blood APCs were stimulated overnight with anti-CD40Ab (1ug/ml) and Poly I:C (5ug/ml) (CD40/PIC) in the presence of brefeldin-A and stained for intracellular IL-10 (Mean±SEM and representative staining). (B) Blood APCs were cultured in a 1:5 ratio with naïve allogeneic T cells for 6 hours or 24 hours with or without anti-CD40Ab and Poly I:C. IL-10 secretion was captured on the cell surface for the final 45 minutes of stimulation using the cytokine secretion assay to account for potential bystander activation of T cells that would be blocked by brefeldin-A. Summary of %IL-10+ APCs and T cells (Mean±SEM). Representative plot showing histograms of IL-10 production within the T cell and APC compartment in unstimulated or stimulated conditions at 6 hours. Dot plots show total cell proportion of HLA-DR+ cells (APCs) and CD3+ cells (T cells) and proportion of subsets producing IL-10. (C) Human naïve CFSE labeled T cells were co-cultured with unstimulated allogeneic blood APCs and recombinant IL-10 was added in increasing concentrations. Frequency of proliferating CD8 T cells expressing CD103 after 6 days of culture (Mean±SEM)

Figure S4

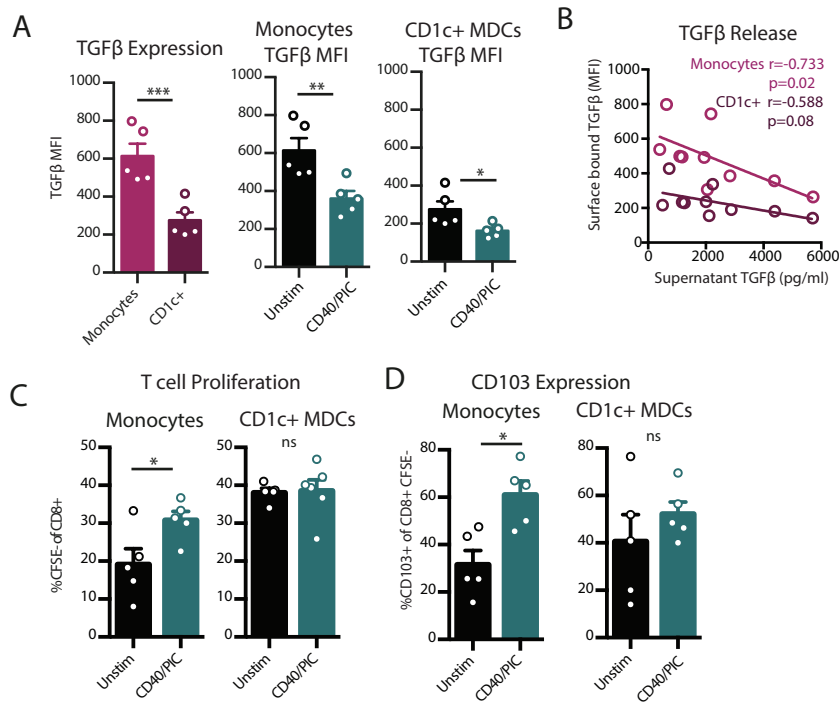

**Supplemental Figure 4: Monocytes are main producer of TGFβ, Related to Figure 4**

(A) Surface expression of TGFβ1,2,3 after 6 hours in culture. (B) Correlation of secreted TGFβ1 (X-axis) and monocyte or CD1c+ MDC TGFβ MFI (Y-axis). (C-D) Purified CD14+ monocytes or CD1c+ MDCs were cultured with CFSE labeled allogenic naïve T cells. Frequency of proliferating CD8 T cells (C) and CD103 expression (D). (Mean±SEM)

Supplemental Table 1: Antibodies used for flow cytometry, Related to STAR Methods

Human Panels

| Antibody  | Fluorochrome | Clone         | Company   | Panel                   |
|-----------|--------------|---------------|-----------|-------------------------|
| CD20      | Cy7APC       | L27           | BD        | CD40 Binding/Expression |
| CD3       | Cy7 APC      | SP34-2        | BD        | CD40 Binding/Expression |
| CD40      | FITC         | 5C3           | Biolegend | CD40 Binding/Expression |
| CD11c     | Cy7PE        | 3.9           | Biolegend | CD40 Binding/Expression |
| CD123     | PerCP Cy55   | 7G3           | Biolegend | CD40 Binding/Expression |
| CD14      | BV510        | M5E2          | Biolegend | CD40 Binding/Expression |
| HLA-DR    | BV570        | L243          | Biolegend | CD40 Binding/Expression |
| CD1c      | APC          | AD5-8E7       | Miltenyi  | CD40 Binding/Expression |
| CD141     | VioBlue      | AD5-14H12     | Miltenyi  | CD40 Binding/Expression |
| CD1a      | PE           | SK9           | BD        | Human Skin              |
| CD20      | Cy7APC       | L27           | BD        | Human Skin              |
| CD3       | Cy7APC       | SP34-2        | BD        | Human Skin              |
| CD45      | BV605        | HI30          | BD        | Human Skin              |
| CD40      | FITC         | 5C3           | Biolegend | Human Skin              |
| CD14      | BV510        | M5E2          | Biolegend | Human Skin              |
| HLA-DR    | Cy55PE       | Tü36          | Life Tech | Human Skin              |
| CD1c      | APC          | AD5-8E7       | Miltenyi  | Human Skin              |
| CD141     | VioBlue      | AD5-14H12     | Miltenyi  | Human Skin              |
| CD20      | Cy7APC       | L27           | BD        | IL-10 Secretion/Capture |
| CD3       | Cy7APC       | SP34-2        | BD        | IL-10 Secretion/Capture |
| CD11c     | Cy7PE        | 3.9           | Biolegend | IL-10 Secretion/Capture |
| CD14      | BV510        | M5E2          | Biolegend | IL-10 Secretion/Capture |
| HLA-DR    | TRPE         | TU36          | Life Tech | IL-10 Secretion/Capture |
| CD141     | VioBlue      | AD5-14H12     | Miltenyi  | IL-10 Secretion/Capture |
| CD1c      | PE Vio770    | AD5-8E7       | Miltenyi  | IL-10 Secretion/Capture |
| IL-10     | PE           | catch reagent | Miltenyi  | IL-10 Secretion/Capture |
| CD20      | Cy7 APC      | L27           | BD        | IL-10 ICS               |
| CD3       | Cy7 APC      | SP34-2        | BD        | IL-10 ICS               |
| IL-10     | APC          | JES3-19F1     | BD        | IL-10 ICS               |
| CD11c     | Cy7 PE       | 3.9           | Biolegend | IL-10 ICS               |
| CD14      | BV510        | M5E2          | Biolegend | IL-10 ICS               |
| HLA-DR    | BV570        | L243          | Biolegend | IL-10 ICS               |
| CD123     | PerCp Cy55   | 7G3           | Biolgened | IL-10 ICS               |
| CD1c      | FITC         | AD5-8E7       | Miltenyi  | IL-10 ICS               |
| CD141     | PE           | AD5-14H12     | Miltenyi  | IL-10 ICS               |
| CD103     | PE Cy7       | Ber-ACT8      | BD        | In vitro T cell         |
| CD3       | Cy7APC       | SP34-2        | BD        | In vitro T cell         |
| CD4       | BV605        | L200          | BD        | In vitro T cell         |
| CD8       | PE           | RPA-T8        | BD        | In vitro T cell         |
| CD20      | Cy7APC       | L27           | BD        | TGFb expression         |
| CD3       | Cy7APC       | SP34-2        | BD        | TGFb expression         |
| CD14      | BV510        | M5E2          | Biolegend | TGFb expression         |
| HLA-DR    | TRPE         | TU36          | Life Tech | TGFb expression         |
| CD141     | VioBlue      | AD5-14H12     | miltenyi  | TGFb expression         |
| CD1c      | PE Vio770    | AD5-8E7       | miltenyi  | TGFb expression         |
| TGFb1,2,3 | AF700        | 1D11          | R&D       | TGFb expression         |

Rhesus Macaque Panels

| Antibody | Fluorochrome | Clone     | Company         | Panel                   |
|----------|--------------|-----------|-----------------|-------------------------|
| CD3      | Cy7APC       | SP34-2    | BD              | Rhesus Innate Phenotype |
| CD70     | PE-CF594     | Ki-24     | BD Horizon      | Rhesus Innate Phenotype |
| CD80     | BV605        | L307.4    | BD Horizon      | Rhesus Innate Phenotype |
| CD123    | PerCP Cy55   | 7G3       | BD Pharmingen   | Rhesus Innate Phenotype |
| NKG2a    | PE           | Z199      | Beckman Coulter | Rhesus Innate Phenotype |
| CCR7     | BV421        | G043H7    | Biolegend       | Rhesus Innate Phenotype |
| CD11c    | Cy7PE        | 3.9       | BioLegend       | Rhesus Innate Phenotype |
| CD16     | BV570        | 38G       | BioLegend       | Rhesus Innate Phenotype |
| CD20     | BV650        | 2H7       | BioLegend       | Rhesus Innate Phenotype |
| CD14     | QD800        | TüK4      | Invitrogen      | Rhesus Innate Phenotype |
| HLA-DR   | Cy55PE       | TU36      | Invitrogen      | Rhesus Innate Phenotype |
| BDCA1    | FITC         | AD5-8E7   | Miltenyi        | Rhesus Innate Phenotype |
| CD66     | APC          | TET2      | Miltenyi        | Rhesus Innate Phenotype |
| CD1a     | PE           | SK9       | BD              | Rhesus Tracking         |
| CD209    | PerCP Cy55   | DCN46     | BD              | Rhesus Tracking         |
| CD3      | Cy7APC       | SP34-2    | BD              | Rhesus Tracking         |
| CD45     | BV605        | D058-1283 | BD              | Rhesus Tracking         |
| CD11c    | Cy7PE        | 3.9       | Biolegend       | Rhesus Tracking         |
| CD123    | BV510        | 6H6       | Biolegend       | Rhesus Tracking         |
| CD14     | BV785        | M5E2      | Biolegend       | Rhesus Tracking         |
| CD20     | BV570        | 2H7       | Biolegend       | Rhesus Tracking         |
| HLA-DR   | TRPE         | TU36      | Life Tech       | Rhesus Tracking         |
| BDCA1    | FITC         | AD5-8E7   | Miltenyi        | Rhesus Tracking         |
| CD66     | APC          | TET2      | Miltenyi        | Rhesus Tracking         |
| CD3      | Cy7APC       | SP34-2    | BD              | Rhesus T cell           |
| CD45RA   | Cy7PE        | L48       | BD              | Rhesus T cell           |
| IFNg     | FITC         | B27       | BD              | Rhesus T cell           |
| CD103    | APC          | 2G5       | Beckman Coulter | Rhesus T cell           |
| CCR7     | BV421        | G043H7    | Biolegend       | Rhesus T cell           |
| CD4      | BV785        | OKT4      | BioLegend       | Rhesus T cell           |
| CD69     | Cy5PE        | FN50      | BioLegend       | Rhesus T cell           |
| CD8      | BV711        | RPA-T8    | BioLegend       | Rhesus T cell           |
| IL2      | BV605        | MQ1-17H12 | BioLegend       | Rhesus T cell           |
| TNFa     | BV650        | MAB11     | Biolegend       | Rhesus T cell           |
| CCR8     | PerCp        | 19704     | R&D             | Rhesus T cell           |
| CCR9     | PE           | 112509    | R&D             | Rhesus T cell           |
